# Supplementary material for: PM 2.5 Assimilation within JEDI for NOAA's Regional Air Quality Model (AQMv7): Application to the September 2020 Western U.S. Wildfires
Source: Copernicus journal article supplement (doi:10.5194/egusphere-2025-4098), 2025-09-29
Supplement: Supplementary file [file egusphere-2025-4098-AC3-supplement.pdf]

The manuscript titled “ PM2.5 Assimilation within JEDI for NOAA’s Regional Air Quality Model (AQMv7): Application to the September 2020 Western U.S. Wildfires” by Wang et al. with reference egusphere-2025-4098 is a valuable scientific contribution in operational aerosol assimilation, particularly for wildfire smoke events. Overall, it is very well written and provides a detailed investigation of the PM2.5 assimilation of AirNow and PurpleAir surface observations in AQMv7 for the US in September 2020. The spatio-temporal investigation of the influence on different forest lead times (1-24hours) provide interesting insights.

Overall, I suggest accepting the manuscript with the following major corrections:

Thank you for the thorough evaluation of our manuscript!

In response to the reviewer’s comments, we have revised the manuscript accordingly and addressed the issues raised to strengthen the clarity and robustness of the study. Below, we provide point-by-point responses to the reviewer’s comments, with **our replies shown in blue font. The changes in the revised manuscript are also shown in the blue font.**

#### **General comments:**

A) My first general comment is on the specific purpose of this paper: For me, it is not clear whether the novelty of the contribution is about (1) the general implementation of an PM2.5 assimilation system for surface stations, or (2) just about the impact of additionally assimilating PurpleAir observations.

Thank you for the comment.

This research adds PM<sub>2.5</sub> data assimilation capability for the NOAA operational AQMv7 model within the JEDI framework and evaluates the impact of assimilating PM<sub>2.5</sub> observations, including PurpleAir data, on the prediction of the September 2020 western U.S. wildfire event. In the revised manuscript, we have revised and expanded a paragraph to more clearly summarize the novelty of this work (see the second-to-last paragraph of the Introduction). The revised text is provided below.

Revised manuscript text:

“This study aims to develop and evaluate an initial aerosol analysis capability for the AQMv7 system by assimilating PM<sub>2.5</sub> observations using the JEDI 3D-Var framework. Compared to previous PM<sub>2.5</sub> data assimilation studies, this research adopts the NOAA’s regional operational AQMv7 system and incorporates a new PM<sub>2.5</sub> transform in JEDI for assimilating PM<sub>2.5</sub> observations. In addition to evaluating the impact of assimilating AirNow PM<sub>2.5</sub> measurements on air quality prediction, this study also examines the impact of assimilating low-cost PurpleAir observations. Although PurpleAir data are valuable for real-time air quality monitoring, their impact on numerical air quality prediction has not been thoroughly investigated. To the authors’ best knowledge, this is the first study to demonstrate the value of PurpleAir observations for air quality prediction during a major fire event using the AQMv7 system.”

While the text (title, abstract, introduction) suggest (1), some parts remain confusing in this regard:

1. In l. 81-84 you mention other literature assimilating AirNow PM<sub>2.5</sub> in the US. Please specify the distinctive novelty of this contribution compared to previous work.

We have revised and extended a paragraph to summarize the novelty of this work. Please see the previous reply.

2. It is not clear in Sec.2 what the new developments are and what was already available before. Please state more clearly in the beginning of the section or for each subsection.

- incl l.129: is this part of the new developments?, otherwise please add reference

This section provides a general description of the 3D-Var method used in this research. The PM<sub>2.5</sub> assimilation capability builds upon the existing JEDI framework rather than constituting a new methodological development. Accordingly, we have added an appropriate reference to JEDI to clarify this point.

- incl l.159ff: (same)

Section 2.2.1 describes the new developments introduced for PM<sub>2.5</sub> data assimilation in this study. We first describe PM<sub>2.5</sub> is calculated within the AQMv7 model, then present the development of PM<sub>2.5</sub> transform within JEDI for data assimilation. To make this clearer, the revised manuscript explicitly states that “The PM<sub>2.5</sub> observation operator is constructed by combining the newly developed PM<sub>2.5</sub> transformation recipes in the JEDI Variable Derivation Repository (VADER) with an existing general spatial interpolation operator in the Unified Forward Operator (UFO).” Other development includes a new recipe to derive dry air density from temperature, surface pressure, and delta pressure.

3. Along these lines, it is also not clear in the summary in Sec.5 if l. 565-572 is about new developments. Please specifically summarize the purpose and novel developments of this study in Sec.5 (see also general comment D).

Along with the new development above, other new applications include the specification of background error variances, and updates of aerosol particle number concentrations.

B) Sec. 4.1 contains plenty of plots which are only discussed shortly. This is fine, but I would suggest moving some less important plots in the Apx. (e.g. Fig.5, Fig.8) to increase readability. Or divide into subsections and consider expanding the description of results from each plot (eg temporal, spatial comparison, especially if Sec.4.2 is deleted/shortened:  
see general comment C)

Thank you for the constructive comments. We have restructured Section 4 by removing section 4.2. The revised manuscript provides a clearer and more detailed interpretation of the results shown in the remaining figures and added new figures and discussion.

C) Sec. 4.2: Concerning the whole content of Sec.4.2: The only new result I can see in this section is l.538-541. All the rest seems to reproduce the results of Sec.4.1. I suggest removing this whole section, and maybe putting some of the plots in the Apx. (eg Fig.10 if the results in l.538-541 are considered important). Otherwise:

- Please explain more clearly why you are specifically looking at the forecast initialized at 12UTC. You mention the operational 72-hour forecast, but only show results for forecast

hour 1-24. What additional information does this investigation provide compared to the overall results above?

- e.g. Given the fact that I don't know where Areas B and C are exactly (see smaller comment 15): What is the additional result of 1.531f compared to Fig.7? Also 1.533-537, 1.542-544
- Please restrict this section to specifying and discussing the novel results that cannot be obtained from Sec.4.1.

Thank you for your insightful comments! We agree that removing the section 4.2 does not affect the overall integrity and main conclusions of the manuscript. In the revised manuscript, the original section 4.2 was removed. However, a new figure was added to demonstrate the data assimilation impact on EPA regions.

D) Sec.5: I'm missing an actual summary and discussion of the results of this study. What conclusions do you draw from the results above? You show plenty of plots with different aspects in Sec.4, I would wonder if the only important aspects you want to summarize and discuss are in 1.573-584.

In addition to addressing the comment A.3 that is to summarize the purpose and novel developments of this study in Sec.5, we briefly summarize the specification of background error variances, updates of aerosol particle number concentrations, and data assimilation impact on forecast.

1. e.g. Do you have any explanation or conclusion from the temporal and spatial differences between the runs that you describe in Sec. 4?

Overall, assimilating AirNow data alone or together with PurpleAir data, improves forecast skill (as measured by MAE and RMSE) for up to 24 hours. Reductions in MAE and RMSE are observed across all EPA regions, with the largest improvements occurring in areas affected by fire events or influenced by transported smoke. These results suggest that data assimilation is most valuable in regions with highly variable pollutant levels, and primarily enhances short-term forecast accuracy.

2. The remaining parts of Sec.5 are about previous work (as far as I understand, 1.565-572, compare general comment A:3) and outlook (1.585-608).

You are correct. We had shortened the above contents in the revised manuscript.

#### **Smaller comments:**

1. Sec.3 includes lots of different subsections. I would suggest giving a short overview of the content at the beginning of the Sec.3.

Thanks for your suggestion. A short overview was added at the beginning of Sec.3.

Revised manuscript text:

“In this section, the September 2020 western U.S. wildfire event and the model configuration are first briefly introduced. This is followed by a description of the PM<sub>2.5</sub> observation processing, including PurpleAir PM<sub>2.5</sub> quality control, bias correction, and observation error specification. Next, the background error specification and the updates to total particle number and surface area concentrations are presented. Finally, the design of the data assimilation experiments is described. ”

2. Sec.3.1: Please provide some more general information on the region that you're discussing,

eg west/east? which state?... For a non-US reader it's not obvious where the Willamette Valley is. And please specify what you are referring to as "broader region"?

Thanks for pointing this out. We have added that the Willamette Valley is located in western Oregon. Additionally, we clarify that the "broader region" refers to the Pacific Northwest, including Oregon and Washington. These changes provide context for non-U.S. readers.

3. l. 234f: Which reference PM<sub>2.5</sub> data did you use in your modified regression equation?

The reference data is AirNow PM data. The hourly regression equation is removed since it is not actually used.

Please specify.

4. l. 244-256: Please restructure this paragraph. If I understand correctly, you're switching between AirNow (l.245, l.247f, l.250ff) and PurpleAir (l.246, l.248f) multiple times. Please formulate more clearly.

- l. 247f: Does this refer to PurpleAir? Please specify.

- l. 248f: Redundant information with l.245.

- l.249 "5%": For comparison to your setup, please specify the type of observations they assigned with 5% errors, eg lowcost or "AirNow-like" stations?

The paragraph was restructured. It explicitly states "The AirNow PM<sub>2.5</sub> observation errors were set to 5% of the observed values. For PurpleAir PM<sub>2.5</sub> data, the observation errors were set to 10%".

- l. 253: Unit of "1.5" missing (should be the same as PM<sub>2.5</sub> concentrations, no?)

Contents removed.

- l. 254ff: Unclear, please specify where these numbers coming from. Is this a result from the spatial averaging to a 0.1deg grid? As far I understand, this can only reduce the effect of large PM<sub>2.5</sub> observations if there are always multiple observations within one gridcell. Is this always the case? Please explain.

Contents removed.

5. l. 259: Please specify the matched stations in Fig.1d. Does this refer to locations where both networks have closely located stations? If yes, which criteria did you use to define "closely located"?

- At the end of this subsection, it is also not clear why you are looking at the matched values in Fig.1d. What does it tell you? Is there any consequence you are taking from it?

Otherwise, remove Fig.1d.

Figure 1d was removed.

6. l. 289: Is the linear relationship the same for all 70 variables? Please describe.

Yes. This is explicitly stated in the manuscript.

7. l.308: inconsistent notation of innovation vector: here(l.308) bold d, Eq.2: non-bold d, Eq.9: non-bold d with subscript b and superscript o. Please unify or define differences.

The inconsistent notation was fixed.

8. 1. 338: I would associate a "cutoff scale" this to be the distance at which the correlation function is "cut off", assuming zero correlation beyond that. But this is different from a correlation length that determines the shape of the correlation function itself. Please specify. You are correct that a "cutoff scale" is the distance at which the correlation function is "cut off", assuming zero correlation beyond that. JEDI uses these cut-off scales in background error correlation parameters, which are different from GSI and WRFDA.

9. 1. 374: Please specify what happens to the PM2.5 field at the initialization times. Do you initialize from the last analysis? Since you assimilate PM2.5 every 3 hours, what is the difference in PM2.5 between the assimilation times and the initialization times? Or does the initialization only apply to meteorological fields?

At each analysis time, all aerosol-related prognostic variables are updated through data assimilation. The updated aerosol fields, together with the meteorological initial conditions, are then used to initialize the subsequent forecasts. The experiments are fully cycling data assimilation and forecasting experiments; therefore, except for the very first forecast, all forecasts are initialized from the aerosol analysis of the previous cycle. Data assimilation is performed every 3 hours, and a 3-hour forecast is launched at each cycle. This 3-hour forecast serves as the background for the subsequent data assimilation cycle. In addition, forecasts initialized at 0000, 0600, 1200, and 1800 UTC are extended to 24 hours for evaluation purposes. The above description is incorporated in the revised manuscript. Please see Section 3.1 and 3.5 for more information in the revised manuscript.

10. 1. 383: Are these independent observations left out for the experiments that assimilate AirNow? And if not: How can the bias of DA\_AN be worse than DA\_ANPA (and DA\_PA) during the first forecast hours, if compared against the same assimilated AirNow data (Fig.3)? Please discuss the implications of validating the different experiments with AirNow data concerning potentially temporally-correlated errors.

No independent AirNow observations were withheld for evaluation.

In the plot, bias is shown as a function of forecast lead time for all forecasts initialized four times daily. When examining the 1-hour forecast bias for each individual cycle (00Z, 06Z, 12Z, and 18Z, Table. s1), the DA\_AN experiment exhibits the best performance in terms of bias except for the cycle at 06Z. When all forecast samples are combined, the positive and negative biases in the DA\_PA and DA\_ANPA experiments largely cancel out, resulting in a near-zero overall bias. That is why we also need to look at MAE and RMSE. It is seen in the below Table. s1, the DA\_AN experiment consistently exhibits the best performance in terms of MAE and RMSE.

**Table s1.** Bias, MAE, and RMSE of forecasts initialized at 00Z, 06Z, 12Z, and 18Z, evaluated at forecast hour 1.

| INIT Time | EXP | BIAS | MAE  | RMSE |
|-----------|-----|------|------|------|
|           | CTR | -4.6 | 14.9 | 52.7 |

|     |         |      |      |       |
|-----|---------|------|------|-------|
| 00Z | DA_AN   | 0.1  | 4.1  | 15.3  |
|     | DA_PA   | -1.9 | 10.0 | 33.0  |
|     | DA_ANPA | -0.9 | 5.0  | 19.7  |
| 06Z | CTR     | -1.1 | 16.3 | 66.8  |
|     | DA_AN   | 0.7  | 4.7  | 23.1  |
|     | DA_PA   | -0.2 | 10.6 | 41.8  |
|     | DA_ANPA | 0.2  | 5.7  | 27.4  |
| 12Z | CTR     | 3.3  | 18.5 | 112.3 |
|     | DA_AN   | 1.7  | 5.5  | 31.3  |
|     | DA_PA   | 2.5  | 12.8 | 89.3  |
|     | DA_ANPA | 1.6  | 6.7  | 38.7  |
| 18Z | CTR     | -1.6 | 15.9 | 65.8  |
|     | DA_AN   | 0.3  | 4.5  | 16.7  |
|     | DA_PA   | -0.7 | 10.5 | 42.3  |
|     | DA_ANPA | -0.6 | 5.3  | 19.2  |

Moverover, the control run appears to overshoot the diurnal cycle, with a negative bias of  $-4.6$  at 00Z and a positive bias of  $3.3$  at 12Z (Table. s1). These relatively strong systematic biases may limit the effectiveness of data assimilation compared to cases with weaker bias since data assimilation theory usually assumes an unbiased prior (background) state.

It is noted that in theory, data assimilation minimizes the weighted squared difference between the model state and observations, but it does not explicitly guarantee a reduction in bias. While bias is often reduced in practice, this is not always the case. Moreover, the calculated bias does not account for the relative weights assigned to individual observations in the assimilation process in this study.

We acknowledge that validating experiments against assimilated AirNow observations may introduce temporally correlated errors, particularly at short lead times.

11. Fig.3: Please discuss why the bias of the joint assimilation DA\_ANPA is closer to CTR than each of the single-obs. assimilations DA\_AN and DA\_PA. Please also discuss the change in biases over time, i.e. increasing underestimation with forecast time which makes the single-obs. assimilations DA\_AN, DA\_PA being least biased for longer forecast hours.

In the revised manuscript, we discussed the bias at the forecast hour 1 and the trend of bias.

As shown in the reply to the previous comment, *bias* is limited because negative and positive biases cancel each other out. That is why we need to look at skills in terms of MAE and RMSE.

The bias in the control run follows an upward trend initially, then reverses into a downward trend. The data assimilation runs exhibit a similar trend, since data assimilation generally adjusts the initial state variables rather than eliminating systematic model bias.

This paper primarily focuses on the development of the data assimilation scheme and the evaluation of data impacts. We think that the observed bias evolution is mainly controlled by diurnal cycles/variations but dominated by certain forecast cycles (for example, 00Z) and their interactions between fire emissions and meteorological processes, particularly boundary layer physics (e.g., the diurnal evolution of PBL height).

12. l. 458f: This can hardly be quantified from Fig7. For the assimilation runs, it would be helpful to show their differences to AirNow validation observations. I would suggest e.g. removing their absolute PM2.5 fields (Fig.7c,e,g) and showing their differences to AirNow validation along with their differences to the control (keeping Fig.7,d,f,h).

Thank you for the comment.

One unique feature of this fire event is the extremely high PM2.5 values, ranging from 0 to 800  $\mu\text{g m}^{-3}$ , which makes it difficult to visually differentiate differences between experiments over the large CONUS domain. We explored various approaches, including the one you suggested, but ultimately chose the current figures because they best serve the goal of our presentation.

The purpose of these panels is to illustrate how the 1-h forecasts from the data assimilation experiments are improved relative to the control (CTR) run. For this reason, the CTR experiment is used as the reference in Figures 7d, 7f, and 7h, highlighting the relative impact of data assimilation. By comparing these panels with Figure 7b, the improvements in the 1-h forecasts from the assimilation experiments can be more clearly identified.

13. l. 483ff: I assume you refer to mean reductions (domain-averaged)? Local reductions seem to be much larger and varying. Moreover, when you only discuss mean reductions, this does not fit to in the discussion on spatial distributions here (introduced in l.442f, summarized in l.487ff). Please either discuss spatial distributions OR

- show only mean reductions in the figure (replacing Fig.8)
- and move this paragraph where it fits

You are correct that the mean reductions shown in Fig. 8 represent domain-averaged values over all stations, while local reductions can be larger and more variable.

To address your comment, we have restructured this section to focus on the main results. Figures were updated to show only the 24-h MAE change for clarity. To also capture spatial variations, a new figure presenting statistics across EPA regions 1–10 has been added, clearly illustrating the impact of data assimilation regionally.

14. l. 491f: This was not mentioned above. From which plot do you see this? Please specify.  
[Figure. 7.](#)

15. l. 517-522: Please write a bit more where these Areas A,B,C are located (eg states). For external readers, it's hard to guess just from the given information.  
[Related contents are removed in the revised manuscript.](#)

16. l. 525f: Is this a guess? Or how do you conclude this?  
[Related contents are removed in the revised manuscript.](#)

17. l. 579-582: The sentence suggests that these results from the given reference. But the reference is from 2023 while the case study is from 2025, that's not possible. Please clarify.  
[Sorry for the typo about the year for the September fire event, which took place in 2020.](#)

18. l. 582f: Now it's November 2025, I assume the data coverage did not change significantly within 2 months. Furthermore, you only use data from 2020 in this study. Is there maybe a mistake in the year (see also comment above)? Or I completely misunderstand this paragraph.  
[Thank you for pointing this out. The year has been corrected in the revised manuscript.](#)

19. l. 585-595: Confusing. You talked about the results before (l. 573-584), and now afterwards about the implementation (l.585-595). I suggest restructuring. The year has been corrected in the revised manuscript.  
[The paragraph was rephased to reduce confusion. The year had been correct as well.](#)

20. l. 596-608: I'm not sure if you need to discuss these challenges in that much detail here. This work is about assimilation of surface observations, and in my point of view it's enough here to say that you are planning to include improved AOD assimilation into the system.  
[The details on challenging in assimilating AOD are removed in revised manuscript.](#)

Technical and formulation-related comments:

- l. 27-29: That's a very technical sentence for the abstract. At this point, it is not clear what control variables are in this context. And how background error standard deviations scale to background state values. It looks like quite a lot of information was squeezed into one sentence. Is it necessary to be included in the abstract? If yes, please expand, otherwise I suggest removing here.

[Thanks for your suggestion. A key component in a data assimilation scheme is the control variable and their background error statistics. Limited to the length of the abstract, we don't explicitly list the names of all the 70 control variables, which are prognostic variables in the AQMv7.0 model. However, it is clearly mentioned that the control variables are individual aerosol species, how their errors are generally specified. Details can be found in section 3.](#)

- l. 34: Please explain the abbreviation "CONUS" once.



Updated to Continental United States.

- l. 45f: Do you refer to the specific AQI of EPA, or in general to any AQI? Please specify.

It is the specific AQI of the U.S. Environmental Protection Agency. The manuscript is updated to reflect this.

- l. 179-183: Is there a square missing somewhere? The diagonal of a covariance is the variance, squared standard deviation. So Sigma should be the variance matrix, or it has to be  $\Sigma^2$  in Eq.(5). (also in l.184ff).

The error covariance B is decomposed into a standard deviation matrix ( $\Sigma$ ) and a correlation matrix (C),  $B = \Sigma C \Sigma$

$\Sigma$  is a diagonal matrix, with the standard deviation. If the correlation is ignored,  $B = \Sigma \Sigma$ , which is the multiplication of two matrices. The results will be the square of standard deviation as you mentioned.

- l. 198f: please specify. In that region (which region, see smaller comment 2)? Or in whole US?

The region is the Pacific Northwest (primarily eastern Washington and western Oregon) during the September 2020 wildfires. The manuscript is updated accordingly.

- l. 240ff: Can this be seen from Fig.1b? Please add reference to plot.

The PurpleAir coverage (Fig. 1b) was well described in Section 3.2.3. So that the related description was removed in Section 3.2.2.

- l. 257f: The two sentences introducing different plots in Fig.1a-b and Fig1.c-d are confusing, because they are disconnected from their descriptions/interpretations below. I suggest moving the sentences referring to Fig.1a-b (l.259-263) directly after mentioning Fig.1a-b here. And moving the sentence introducing Fig.1c-d down right before its description in l.263ff.

The paragraph was rephrased according to your comments.

- l. 297-301: You are mentioning multiple times that background PM2.5 error variance is denoted as  $\Sigma^2$ . That might be confusing. I'd suggest defining once, and using either words or symbol afterwards.

We reduce use of the symbol and keep it only when describing the Eq. 9.

- l. 327: Technically, Fig.2 is not not PM2.5 space. This would be eg showing the background error standard deviation as function of PM2.5. Do you mean the PM2.5 background error standard deviation as (weighted) sum over all 70 variables?

The figure is intended to illustrate the key difference between the proposed dynamically location- and time-dependent varying background error formulation and the traditional static, constant background errors. Rather than displaying background error standard deviations for individual aerosol species, Figure 2 shows the effective PM<sub>2.5</sub> background error standard deviation after applying the scaling factor. This PM<sub>2.5</sub> error standard deviation reflects the combined contribution of aerosol species to PM<sub>2.5</sub>, rather than a simple weighted sum of all individual prognostic variables.

- l. 389f: This sentence is doubled with l.383.

Fixed.

- Fig.4: Description of mean missing in figure caption.

Fixed.

- l. 422: two verbs (“presents shows”)

Fixed.

- Fig.5, 7, 8, ...: Icons and labels are very small and hard to see/read.

Fig. 5 has been removed in the revised manuscript. Figures 7 and 8 have been slightly adjusted. We can further enhance them if necessary.

- l. 523: capital “F” in “figure”

Fixed.

- l. 593: remove “.” before reference

Fixed.

- l. 593ff: is an ensemble prediction system planned for AQM? Please explain or remove Sentence.

Removed.
